# Supplementary material
Source: PubMed Central journal article supplement (PMC3063640)

Fig. S2 Venn diagrams of probe sets that significantly change expression with age or selection. (A) Change in expression with age in C lines and (B) LS lines. (C) Change in expression with selection shown by contrast at the same chronological age and (F) physiological age. (D) Probe sets up-regulated by selection at day 35 in LS lines (LS35up) and down-regulated by aging at day 35 in C (ACdown) and L lines (ALdown). (E) Probe sets down-regulated by selection at day 35 in LS lines (LS35down) and up-regulated by aging at day 35 in C (ACup) and LS lines (ALup).

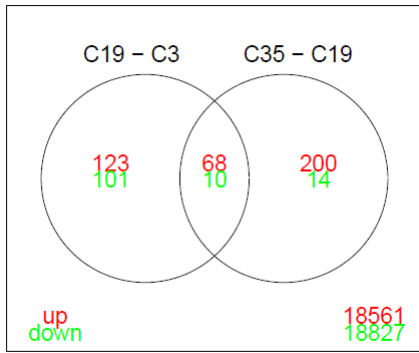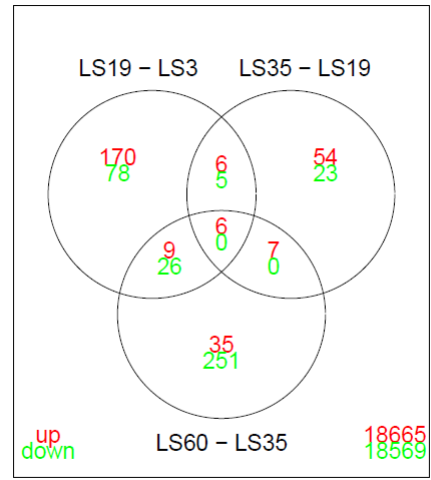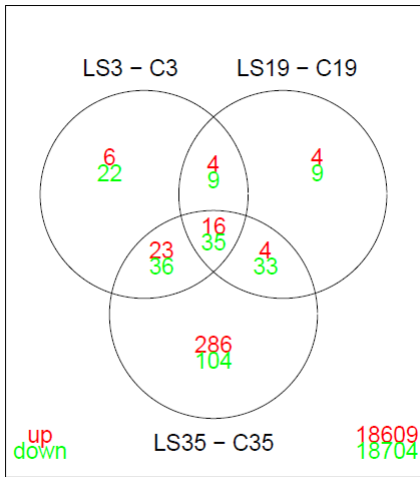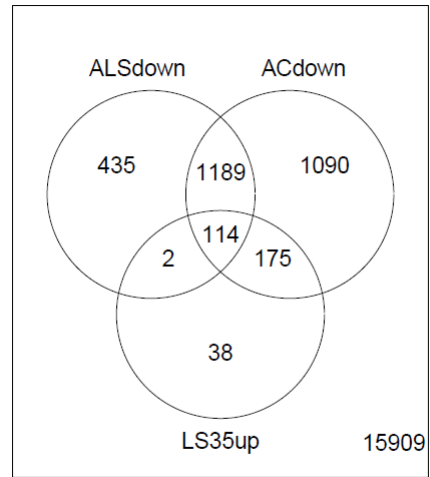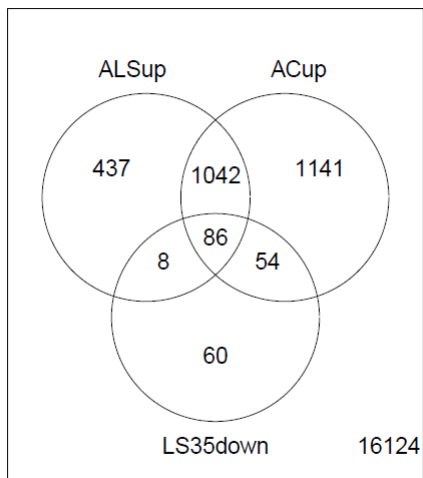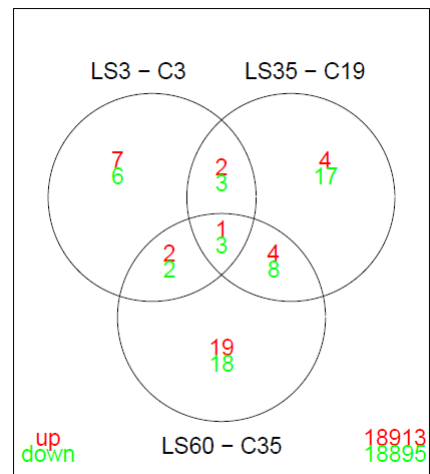

Supplement: 11357_2010_9162_MOESM2_ESM.pdf [file 11357_2010_9162_MOESM2_ESM.pdf]
