# Supplementary material
Source: PubMed Central journal article supplement (PMC3063640)

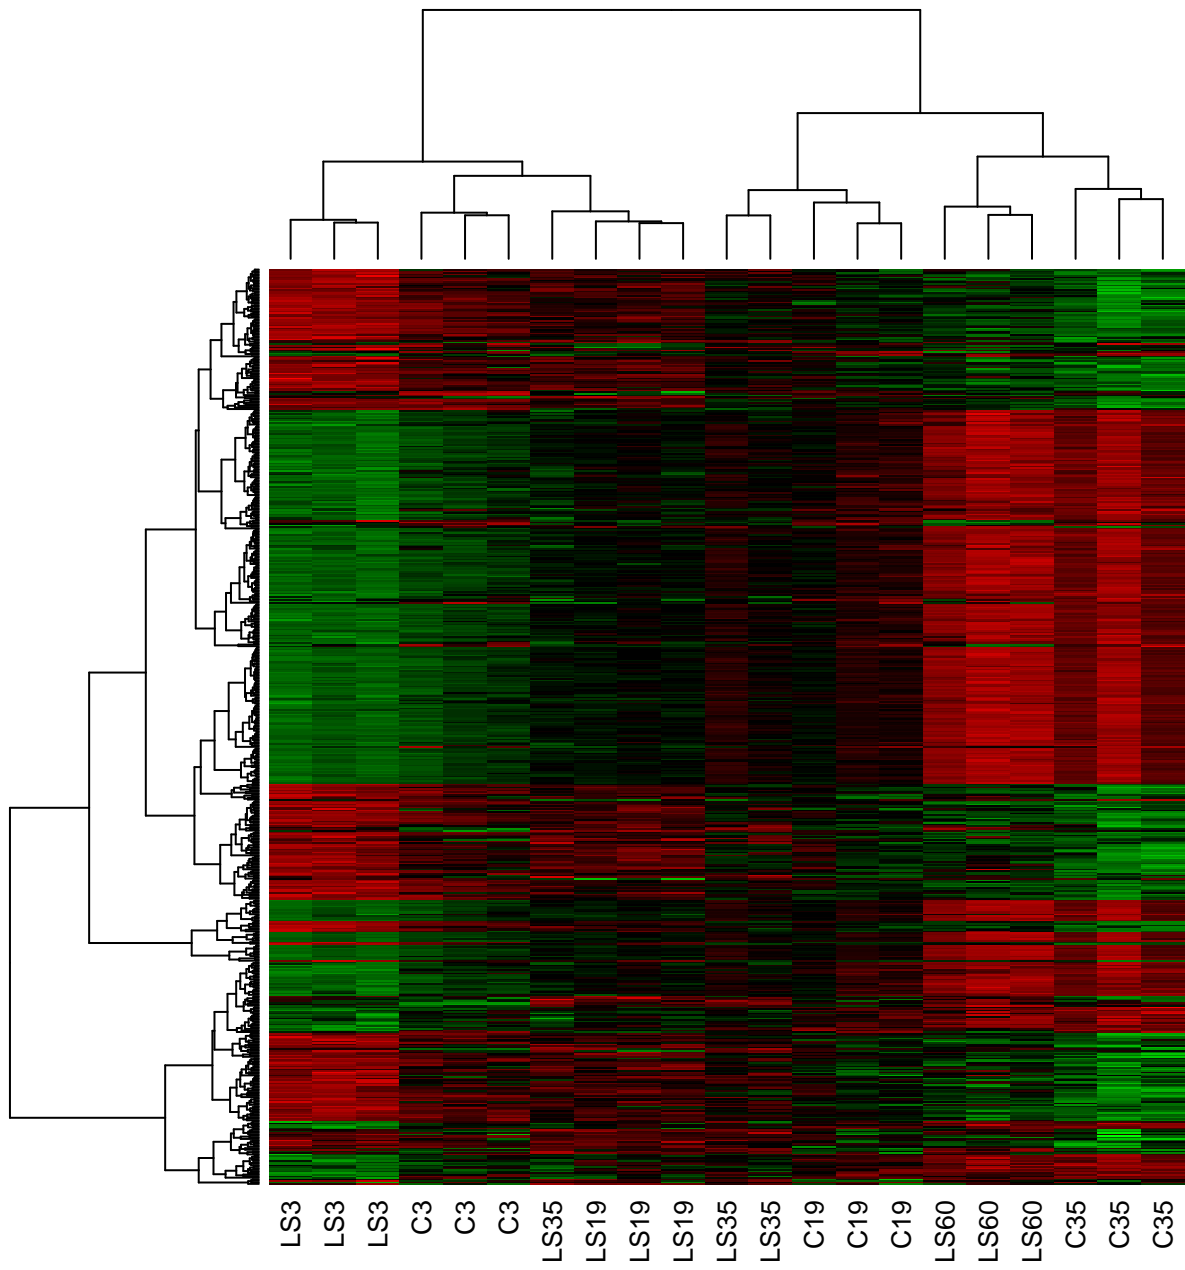

Supplement: 11357_2010_9162_MOESM4_ESM.pdf [file 11357_2010_9162_MOESM4_ESM.pdf]
